# Supplementary material
Source: PubMed Central journal article supplement (PMC7837230)
Supplement: mmc1.pdf [file mmc1.pdf]

# THE LANCET Microbe

## Supplementary appendix

This appendix formed part of the original submission and has been peer reviewed.  
We post it as supplied by the authors.

Supplement to: Cevik M, Tate M, Lloyd O, et al. SARS-CoV-2, SARS-CoV, and MERS-CoV viral load dynamics, duration of viral shedding, and infectiousness: a systematic review and meta-analysis. *Lancet Microbe* 2020; published online November 19.  
[https://doi.org/10.1016/S2666-5247\(20\)30172-5](https://doi.org/10.1016/S2666-5247(20)30172-5).

**Supplementary Table 1: Summary of included studies**

| Study                               | Geographical location           | Study setting | Study design         | Number of patients | Age Median (IQR) | Male sex N (%) | Specimen types                      |
|-------------------------------------|---------------------------------|---------------|----------------------|--------------------|------------------|----------------|-------------------------------------|
| <b>SARS-CoV-2</b>                   |                                 |               |                      |                    |                  |                |                                     |
| <b>Andersson et al.<sup>1</sup></b> | Oxford, UK                      | Hospital      | Case series          | 167                | 56 (46-76)       | 89 (53)        | Serum                               |
| <b>Arons et al.<sup>2</sup></b>     | King's County, USA              | Care home     | Cross-sectional      | 46                 | 78.6 ± 9.5*      | NR             | URT                                 |
| <b>Bullard et al.<sup>3</sup></b>   | Manitoba, Canada                | Hospital      | Case series          | 90                 | 45 (30-59)       | 44 (49)        | Respiratory samples (not specified) |
| <b>Cai et al.<sup>4</sup></b>       | Shanghai/ Hefei/ Qingdao, China | Hospital      | Case series          | 10                 | 6                | 4 (40)         | LRT, blood, stool, urine            |
| <b>Cai et al.<sup>5</sup></b>       | Shenzhen, China                 | Hospital      | Case series          | 298                | 47 (33-61)       | 149 (50)       | URT                                 |
| <b>Chang et al.<sup>6</sup></b>     | Beijing, China                  | Hospital      | Case series          | 16                 | 35.5 (24-53)     | 11 (69)        | URT                                 |
| <b>Chau et al.<sup>7</sup></b>      | Ho Chi Minh City, Vietnam       | Hospital      | Case series          | 30                 | 29 (16-60)       | 15 (50)        | URT                                 |
| <b>Chen et al.<sup>8</sup></b>      | Shanghai, China                 | Hospital      | Case series          | 249                | 51 (36-64)       | 126 (51)       | URT                                 |
| <b>Chen et al.<sup>9</sup></b>      | Wuhan, China                    | Hospital      | Case series          | 25                 | 51.4 ± 16.6*     | 11 (44)        | URT                                 |
| <b>Chen et al.<sup>10</sup></b>     | Guangzhou, China                | Hospital      | Case series          | 284                | 48 (33-62)       | 131 (46)       | URT                                 |
| <b>Chen et al.<sup>11</sup></b>     | Wuhan, China                    | Hospital      | Case series          | 42                 | 51               | 15 (36)        | URT, stool, urine                   |
| <b>Corman et al.<sup>12</sup></b>   | Germany                         | Hospital      | Case series          | 18                 | NR               | 12 (67)        | Blood                               |
| <b>Fan et al.<sup>13</sup></b>      | Shenyang, China                 | Hospital      | Case series          | 55                 | 46.8             | 30 (55)        | URT, sputum                         |
| <b>Fang et al.<sup>14</sup></b>     | Xiangtan, China                 | Hospital      | Case series          | 32                 | 41               | 16 (50)        | URT, stool, blood                   |
| <b>Fu et al.<sup>15</sup></b>       | Huazhong, China                 | Hospital      | Case series          | 50                 | 64 (37-87)       | 27 (54)        | URT                                 |
| <b>Han et al.<sup>16</sup></b>      | Chongqing, South Korea          | Hospital      | Case series          | 12                 | 6.5 (0.007-16)   | 5 (42)         | URT, stool                          |
| <b>He et al.<sup>17</sup></b>       | Guangzhou, China                | Hospital      | Case series          | 94                 | 46               | 47 (50)        | URT                                 |
| <b>Hu et al.<sup>18</sup></b>       | Qingdao, China                  | Hospital      | Case series          | 59                 | 46 (33-57)       | 28 (47)        | URT                                 |
| <b>Hu et al.<sup>19</sup></b>       | Nanjing, China                  | Hospital      | Case series          | 24                 | 32.5 (21-57)     | 8 (33)         | URT                                 |
| <b>Huang et al.<sup>20</sup></b>    | Guangzhou, China                | Hospital      | Case series          | 27                 | NR               | 12 (44)        | URT                                 |
| <b>Huang et al.<sup>21</sup></b>    | Wenzhou, China                  | Hospital      | Case series          | 33                 | 47 (range 2-84)  | 17 (52)        | URT, LRT, stool                     |
| <b>Huang et al.<sup>22</sup></b>    | Wuhan, China                    | Hospital      | Retrospective cohort | 200                | 58 ± 17*         | 115 (48)       | URT                                 |
| <b>Hung et al.<sup>23</sup></b>     | Hong Kong                       | Hospital      | RCT                  | 127                | 52 (32-62)       | 68 (54)        | URT, stool                          |

|                                       |                                            |                         |                 |     |                      |          |                                               |
|---------------------------------------|--------------------------------------------|-------------------------|-----------------|-----|----------------------|----------|-----------------------------------------------|
| <b>Kim et al.<sup>24</sup></b>        | Soeul/ Incheon/<br>Seongna, South<br>Korea | Hospital                | Case series     | 28  | 40 (28-54)           | 15 (54)  | URT, LRT                                      |
| <b>Kujawski et al.<sup>25</sup></b>   | 6 states, USA                              | Hospital<br>/Outpatient | Case series     | 12  | 53 (range 21-<br>68) | 8 (75)   | URT, LRT, stool,<br>blood, urine              |
| <b>L'Huillier et al.<sup>26</sup></b> | Geneva,<br>Switzerland                     | Hospital                | Case series     | 23  | 12 (3.8-14.5)        | NR       | URT                                           |
| <b>La Scola et al.<sup>27</sup></b>   | France                                     | Hospital                | Case series     | 155 | NR                   | NR       | URT, LRT                                      |
| <b>Lavezzo et al.<sup>28</sup></b>    | Vo', Italy                                 | Community               | Cross-sectional |     | Mixed                | Mixed    | URT                                           |
| <b>Le et al.<sup>29</sup></b>         | Hanoi, Vietnam                             | Hospital                | Case series     | 12  | 29.5*                | 3 (25)   | URT                                           |
| <b>Li et al.<sup>30</sup></b>         | Wuhan China                                | Hospital                | Case series     | 36  | 57.5 (52-65)         | 23 (64)  | URT                                           |
| <b>Liang et al.<sup>31</sup></b>      | Wuhan, China                               | Hospital                | Case series     | 120 | 61.5 (47-70)         | 68 (57)  | URT                                           |
| <b>Ling et al.<sup>32</sup></b>       | Shanghai, China                            | Hospital                | Case series     | 66  | 44 (16-778)          | 38 (58)  | URT, stool,<br>blood, urine                   |
| <b>Liu et al.<sup>33</sup></b>        | Wuhan, China                               | Hospital                | Case series     | 238 | 55 (38.3-65)         | 138 (58) | URT                                           |
| <b>Liu et al.<sup>34</sup></b>        | Nanchang, China                            | Hospital                | Case series     | 76  | 48.3                 | 48 (63)  | URT                                           |
| <b>Lo et al.<sup>35</sup></b>         | Macau, China                               | Hospital                | Case series     | 10  | 54 (27-64)           | 3 (30)   | URT, LRT, stool,<br>urine                     |
| <b>Lou B et al.<sup>36</sup></b>      | Zhejiang, China                            | Hospital                | Case series     | 80  | 55 (45-64)           | 50 (69)  | LRT                                           |
| <b>Pongpirul et al.<sup>37</sup></b>  | Bangkok, Thailand                          | Hospital                | Case series     | 11  | 61 (28-74)           | 6 (55)   | URT                                           |
| <b>Qian et al.<sup>38</sup></b>       | Ningbo, China                              | Hospital                | Case series     | 24  | NR                   | NR       | URT                                           |
| <b>Quan et al.<sup>39</sup></b>       | Wuhan/Shenzhen/<br>Xiangyang, China        | Hospital                | Case series     | 23  | 60.3 ±15.3*          | 23 (100) | Prostatic<br>secretions all<br>negative (URT) |
| <b>Sakurai et al.<sup>40</sup></b>    | Aichi, Japan                               | Hospital                | Case series     | 90  | 59.5 (36-68)         | 53 (59)  | URT                                           |
| <b>Seah et al.<sup>41</sup></b>       | Singapore                                  | Hospital                | Case series     | 17  | NR                   | NR       | Tears                                         |
| <b>Shastri et al.<sup>42</sup></b>    | Mumbai, India                              | Reference lab           | Case series     | 68  | 37 (range 3-75)      | 48 (71)  | URT                                           |
| <b>Shi et al.<sup>43</sup></b>        | Wuhan, China                               | Hospital                | Case series     | 246 | 58 (47-67)           | 126 (51) | URT                                           |

|                                    |                              |                     |                      |     |                                                                                |          |                                                  |
|------------------------------------|------------------------------|---------------------|----------------------|-----|--------------------------------------------------------------------------------|----------|--------------------------------------------------|
| <b>Song et al.</b> <sup>44</sup>   | Nanjing, China               | Hospital            | Case series          | 13  | 22 – 67 (range only)                                                           | 13 (100) | URT, semen, testicular sample                    |
| <b>Song et al.</b> <sup>45</sup>   | Beijing, China               | Hospital/Outpatient | Case series          | 21  | 37 (21-59.5)                                                                   | 8 (38)   | URT                                              |
| <b>Talmy et al.</b> <sup>46</sup>  | Ramat Gan, Israel            | Outpatient          | Case series          | 119 | 21 (19-25)                                                                     | 84 (71)  | URT                                              |
| <b>Tan et al.</b> <sup>47</sup>    | Chongqing, China             | Hospital            | Case series          | 142 | NR                                                                             | NR       | URT                                              |
| <b>Tan et al.</b> <sup>48</sup>    | Chongqing, China             | Hospital            | Case series          | 67  | 49 (10-77)                                                                     | 35 (52)  | URT, LRT, stool, blood, urine                    |
| <b>Tan et al.</b> <sup>49</sup>    | Changsha, China              | Hospital            | Case series          | 10  | 7 (1-12)                                                                       | 3 (30)   | URT, stool                                       |
| <b>Tian et al.</b> <sup>50</sup>   | Beijing, China               | Hospital/Outpatient | Case series          | 75  | 41.5 (range 0.8 – 88)*                                                         | 42 (56)  | Respiratory tract sample (not specified further) |
| <b>To et al.</b> <sup>51</sup>     | Hong Kong, China             | Hospital            | Case series          | 23  | 62 (37-75)                                                                     | 13 (57)  | URT, stool, blood, urine                         |
| <b>To et al.</b> <sup>52</sup>     | Hong Kong, China             | Hospital            | Prospective Cohort   | 12  | 62.5 (37-75)                                                                   | 7 (58)   | URT (saliva)                                     |
| <b>Tu et al.</b> <sup>53</sup>     | Anhui, China                 | Hospital            | Case series          | 40  | Viral shedding <10 days: 40.86 ± 8.26<br>Viral shedding ≥10 days: 45.5 ± 14.60 | 21 (53)  | URT                                              |
| <b>Wang et al.</b> <sup>54</sup>   | Henan, China                 | Hospital            | Case series          | 18  | 39 (29-55)                                                                     | 10 (56)  | URT                                              |
| <b>Wang et al.</b> <sup>55</sup>   | Jinhua, China                | Hospital            | Case series          | 17  | 42 ± 17*                                                                       | 10 (59)  | URT, stool                                       |
| <b>Wölfel et al.</b> <sup>56</sup> | Munich, Germany              | Hospital            | Case series          | 9   | NR                                                                             | NR       | URT, blood, urine                                |
| <b>Wu et al.</b> <sup>57</sup>     | Hainan, China                | Hospital            | Case series          | 91  | 50 (range 21-83)*                                                              | 52 (57)  | URT, stool                                       |
| <b>Wu et al.</b> <sup>58</sup>     | Qingdao, China               | Hospital            | Case series          | 74  | 6 (0.1-15.08 range)                                                            | 44 (59)  | Stool                                            |
| <b>Wu et al.</b> <sup>59</sup>     | Zhuhai, China                | Hospital            | Case series          | 74  | 43.8*                                                                          | 35 (47)  | Stool                                            |
| <b>Wyllie et al.</b> <sup>60</sup> | New Haven, USA               | Hospital            | Case series          | 44  | 61 (23-92 range)*                                                              | 23 (52)  | URT (saliva)                                     |
| <b>Xiao et al.</b> <sup>61</sup>   | Wuhan, China                 | Hospital            | Case series          | 56  | 55 (42-68)                                                                     | 34 (61)  | URT                                              |
| <b>Xiao et al.</b> <sup>62</sup>   | Guangzhou, China             | Hospital            | Case series          | 28  |                                                                                |          | Stool                                            |
| <b>Xu et al.</b> <sup>63</sup>     | Shenzhen/<br>Zhejiang, China | Hospital            | Retrospective Cohort | 113 | 52 (42-63)                                                                     | 66 (58)  | URT                                              |

|                                      |                        |                     |                      |          |                                                           |                                                     |                              |
|--------------------------------------|------------------------|---------------------|----------------------|----------|-----------------------------------------------------------|-----------------------------------------------------|------------------------------|
| <b>Xu et al.</b> <sup>64</sup>       | Shenyang, China        | Hospital            | Case series          | 14       | 48 ± 13.4*                                                | 7 (50)                                              | URT, LRT, serum, conjunctiva |
| <b>Xu et al.</b> <sup>65</sup>       | Guangzhou, China       | Hospital            | Case series          | 10       | 6.6                                                       | 6 (60)                                              | URT, rectal swab             |
| <b>Yan et al.</b> <sup>66</sup>      | Hubei, China           | Hospital            | Case series          | 120      | 52 (35-63)                                                | 54 (45)                                             | URT                          |
| <b>Yang et al.</b> <sup>67</sup>     | Wuhan, China           | Hospital            | Case series          | 78       | Symptomatic:<br>56 (34-63)<br>Asymptomatic:<br>37 (26-45) | Symptomatic:3<br>1 (40)<br>Asymptomatic:<br>11 (33) | URT                          |
| <b>Yang et al.</b> <sup>68</sup>     | Shenzhen, China        | Hospital            | Case series          | 213      | 52 (range 2-86)                                           | 108 (51)                                            | URT, LRT                     |
| <b>Yongchen et al.</b> <sup>69</sup> | Nanjing, Xuzhou, China | Hospital            | Case series          | 21       | 37                                                        | 13 (62)                                             | URT, stool                   |
| <b>Young et al.</b> <sup>70</sup>    | Singapore              | Hospital            | Case series          | 18       | 47                                                        | 9 (50)                                              | URT, stool, blood, urine     |
| <b>Zha et al.</b> <sup>71</sup>      | Wuhu, China            | Hospital            | Case series          | 31       | 39 (32-54)                                                | 20 (65)                                             | URT                          |
| <b>Zhang et al.</b> <sup>72</sup>    | Beijing, China         | Hospital            | Case series          | 23       | 48 (40-62)                                                | 12 (52)                                             | URT, stool, blood, urine     |
| <b>Zhang et al.</b> <sup>73</sup>    | Shenzhen, China        | Hospital            | Case series          | 56       | Mixed                                                     | Mixed                                               | URT, stool                   |
| <b>Zheng et al.</b> <sup>74</sup>    | Zhejiang, China        | Hospital            | Retrospective Cohort | 96       | 53 (33.4-64.8)                                            | NR                                                  | LRT, stool, blood, urine     |
| <b>Zhou et al.</b> <sup>75</sup>     | Wuhan, China           | Hospital            | Case series          | 41       | 58 (48-62)                                                | 22 (54)                                             | URT                          |
| <b>Zhou et al.</b> <sup>76</sup>     | Wuhan, China           | Hospital            | Case series          | 191      | 56 (46-67)                                                | 119 (62)                                            | URT                          |
| <b>Zhou et al.</b> <sup>77</sup>     | Guangzhou, China       | Hospital            | Case series          | 31       | 45 (33-60)<br>37 (28-57)                                  | 4 (44)<br>6 (27)                                    | URT                          |
| <b>Zhu et al.</b> <sup>78</sup>      | Wuhan, China           | Hospital            | Case series          | 10       | 49.5                                                      | 8 (80)                                              | URT                          |
| <b>Zou et al.</b> <sup>79</sup>      | Zhuhai, China          | Hospital/outpatient | Case series          | 18       | 59 (range 26-76)                                          | 9 (50)                                              | URT                          |
| <b>SARS-CoV-1</b>                    |                        |                     |                      |          |                                                           |                                                     |                              |
| <b>Chan et al.</b> <sup>80</sup>     | Hong Kong, China       | Hospital            | Case series          | 415      | 11.3 ± 4.1*<br>37.1 ± 11.2*                               | 132 (33)                                            | URT, LRT, stool, urine       |
| <b>Chen et al.</b> <sup>81</sup>     | Taiwan                 | Hospital            | Case series          | 108      | Stratified                                                | 95                                                  | URT                          |
| <b>Cheng et al.</b> <sup>82</sup>    | Hong Kong, China       | Hospital            | Case series          | 1041     | NR                                                        | NR                                                  | URT, LRT, stool, urine       |
| <b>Kwan et al.</b> <sup>83</sup>     | Hong Kong, China       | Hospital            | Case series          | 12<br>33 | Dialysis: 58<br>(range 34-74);*                           | 6 (50)                                              | URT, stools, urine           |

|                                      |                              |                        |                      |     | Controls: 57<br>(range 34-75) |          |                                  |
|--------------------------------------|------------------------------|------------------------|----------------------|-----|-------------------------------|----------|----------------------------------|
| <b>Liu et al.<sup>84</sup></b>       | Beijing, China               | Hospital               | Case series          | 56  | 31 (male)<br>34 (female)      | 31 (55)  | LRT, stool                       |
| <b>Leong et al.<sup>85</sup></b>     | Singapore                    | Hospital               | Case series          | 64  | 35.2 (17-63<br>range)*        | 16 (25)  | URT, stool,<br>blood, urine      |
| <b>Peiris et al.<sup>86</sup></b>    | Hong Kong, China             | Hospital               | Case series          | 75  | 39.8 (SD 12.2)                | 0.92     | URT                              |
| <b>Xu et al.<sup>87</sup></b>        | Beijing, China               | Hospital               | Case series          | 54  | NR                            | NR       | LRT, blood, urine                |
| <b>MERS-CoV</b>                      |                              |                        |                      |     |                               |          |                                  |
| <b>Al Hosani et al.<sup>88</sup></b> | Abu Dhabi, UAE               | Hospital/commu<br>nity | Case series          | 65  | 20 -59                        | 43 (66)  | LRT                              |
| <b>Al-Jasser et al.<sup>89</sup></b> | Riyadh, Saudi<br>Arabia      | Hospital               | Case series          | 167 | 46.71*                        | 142 (57) | URT                              |
| <b>Alkendi et al.<sup>90</sup></b>   | Tawam/Al Ain, UAE            | Hospital               | Case series          | 58  | 43.5                          | 41 (71)  | URT                              |
| <b>Arabi et al.<sup>91</sup></b>     | Saudi Arabia                 | Hospital               | Cohort               | 330 | 58 (44-69)                    | 225 (68) | URT                              |
| <b>Corman et al.<sup>92</sup></b>    | Riyadh, Saudi<br>Arabia      | Hospital               | Case series          | 37  | 69 (24-90)*                   | 27 (39)  | URT, LRT, stool,<br>blood, urine |
| <b>Hong et al.<sup>93</sup></b>      | Seoul, South Korea           | Hospital               | Case series          | 30  | 49*                           | 19 (63)  | Blood                            |
| <b>Min et al.<sup>94</sup></b>       | Seoul/others, South<br>Korea | Hospital               | Case series          | 14  | 62                            | 6 (35)   | LRT, serum                       |
| <b>Muth et al.<sup>95</sup></b>      | Riyadh, Saudi<br>Arabia      | Hospital               | Case series          | 32  | 66 (24-90)                    | 24 (75)  | LRT                              |
| <b>Oh et al.<sup>96</sup></b>        | Seoul, South Korea           | Hospital               | Case series          | 17  | NR                            | NR       | URT, LRT, serum                  |
| <b>Park et al.<sup>97</sup></b>      | Seoul, South Korea           | Hospital               | Case series          | 17  | NR                            | NR       | URT, LRT                         |
| <b>Shalhoub et al.<sup>98</sup></b>  | Jeddah, Saudi<br>Arabia      | Hospital               | Retrospective cohort | 32  | 65                            | 14 (44)  | LRT, serum                       |

Abbreviations: UK, United Kingdom, USA; United States of America; UAE, United Arab Emirates; RCT, randomised controlled trial; URT, upper respiratory tract; LRT, lower respiratory tract; NR, not reported.

\* Mean  $\pm$  standard deviation (or range if stated).

**Supplementary Figure 1:** Pooled mean duration (days) of SARS-CoV-2 shedding from the lower respiratory tract (random-effects model).

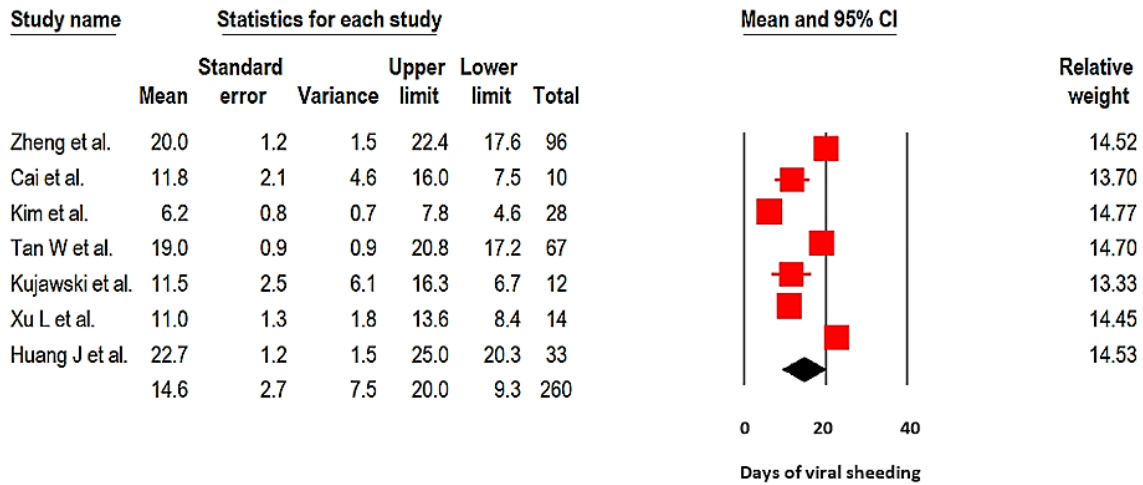

Note: the overall effect is plotted as a black square.

Test for heterogeneity: Q-value = 203.3, df(Q) = 6,  $p < 0.001$ ,  $I^2 = 97\%$ .

**Supp Figure 2.** Pooled mean duration (days) of SARS-CoV-2 shedding in the blood (random-effects model).

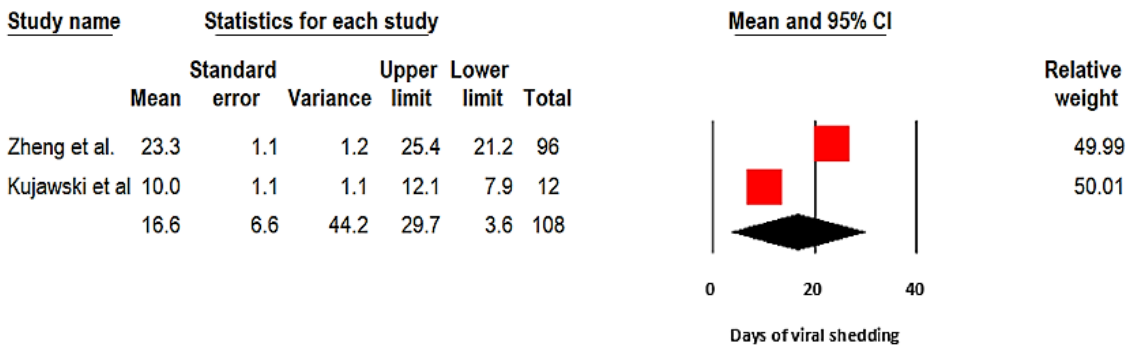

Note: the overall effect is plotted as a black square.

Test for heterogeneity: Q-value = 77,6, df(Q) = 1,  $p < 0.001$ ,  $I^2 = 99\%$ .

**Supplementary Figure 3.** Pooled mean duration (days) of SARS-CoV-2 shedding from the stool (random-effects model).

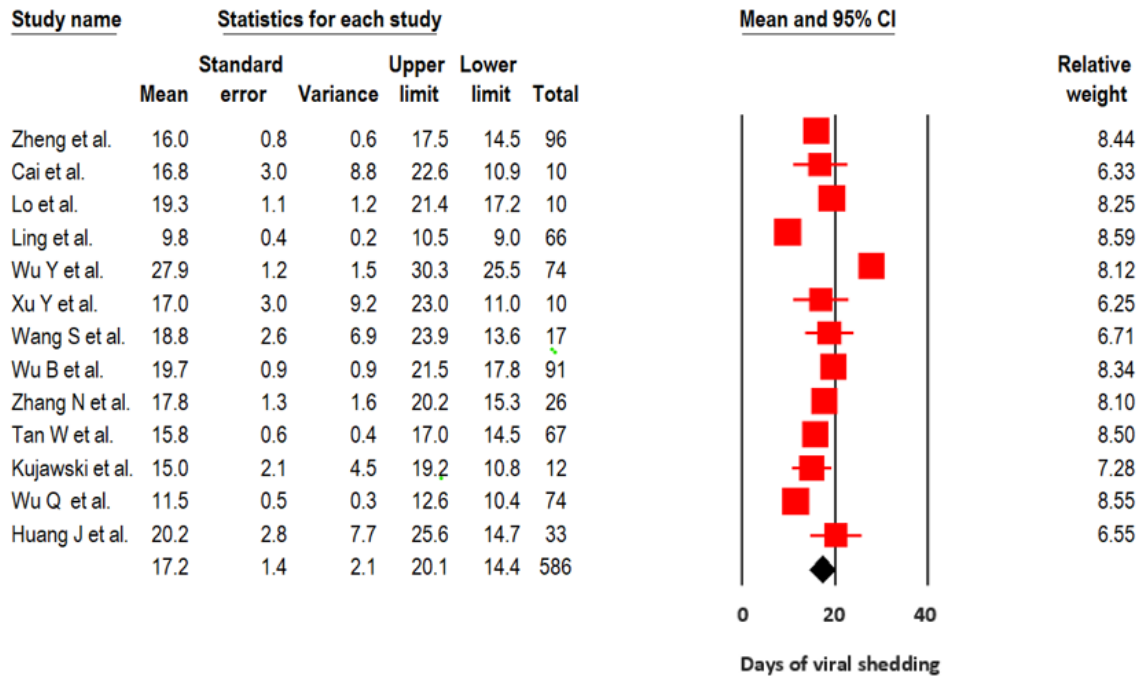

Note: the overall effect is plotted as a black square.

Test for heterogeneity: Q-value = 356.0, df(Q) = 12, p < 0.001, I<sup>2</sup> = 96.6%.

**Supplementary Figure 4.** Meta-regression bubble plot of the impact of age on mean SARS-CoV-2 shedding from the upper respiratory tract

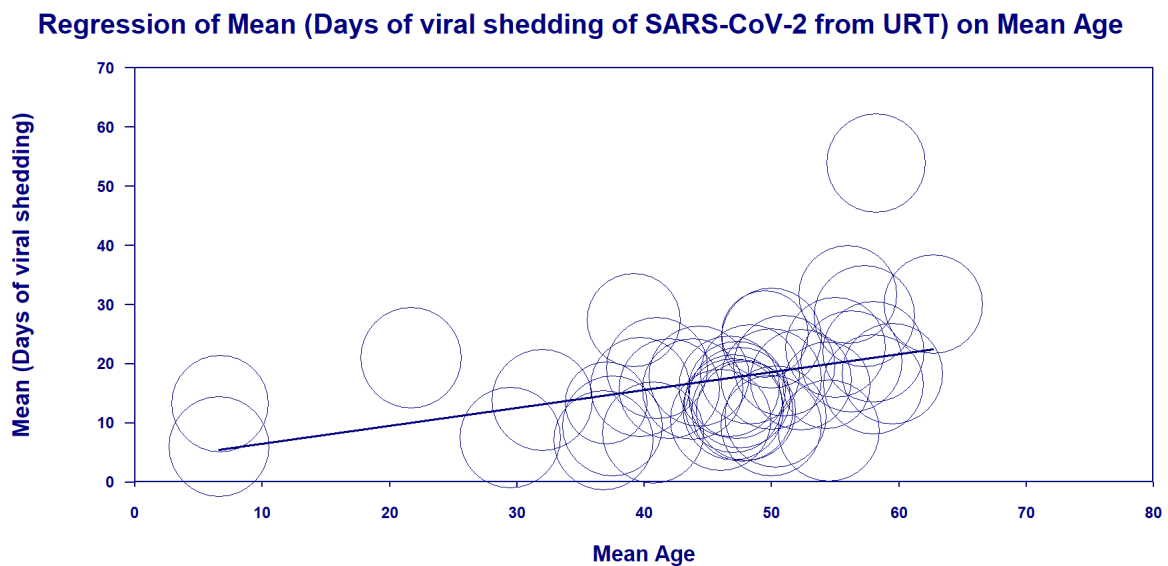

URT: upper respiratory tract.

Note: the plot was built upon 41 studies (no data on mean age from the study of Qian et al.<sup>38</sup>). A random-effects model was used.



**Supplementary Figure 5.** Meta-regression bubble plot of the impact of male proportion on mean SARS-CoV-2 shedding from the upper respiratory tract

**Regression of Mean (Days of viral shedding of SARS-CoV-2 from URT) on Gender, Male %**

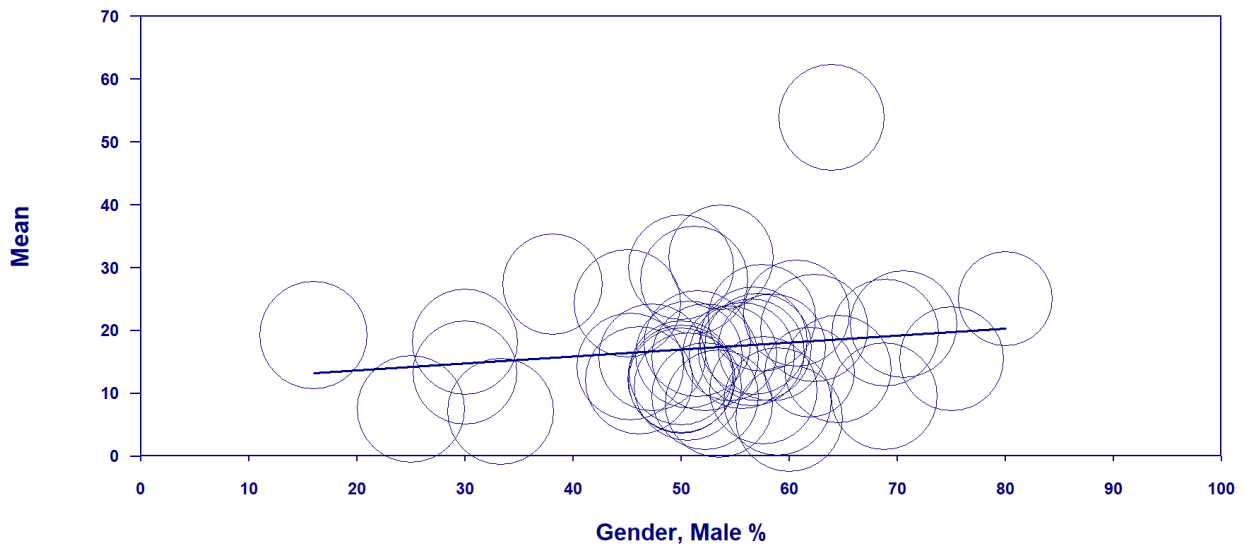

URT: upper respiratory tract.

Note: the plot was built upon 41 observations (no data on mean age from the study of Qian et al.). A random-effects model was used.

**Supplementary Figure 6.** Meta-regression bubble plot of the impact of age on mean SARS-CoV-2 shedding from the stool

**Regression of Mean (Days of viral shedding in stool in SARS-CoV-2 infection) on Mean Age**

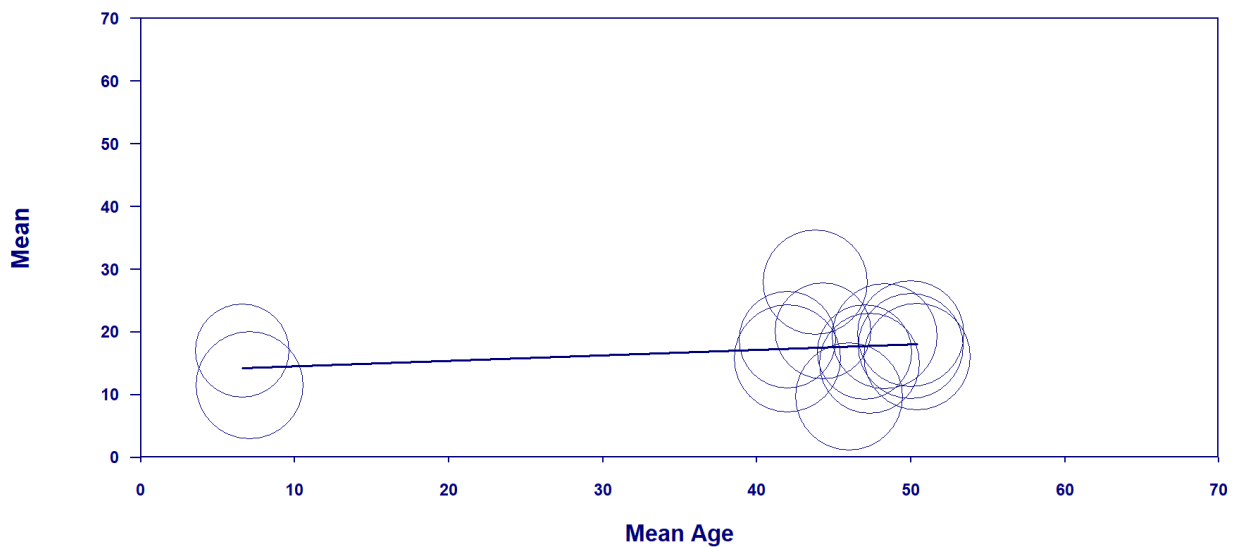

Note: the plot was built upon 13 studies. A random-effects model was used.

(slope: +0.087; 95% CI, -0.128 to +0.302; p = 0.43)

## Supplementary Table 2: Critical Appraisal

### CASE SERIES

#### SARS-CoV-2

|                    | 1. Were there clear criteria for inclusion in the case series? | 2. Was the condition measured in a standard, reliable way for all participants included in the case series? | 3. Were valid methods used for identification of the condition for all participants included in the case series? | 4. Did the case series have consecutive inclusion of participants? | 5. Did the case series have complete inclusion of participants? | 6. Was there clear reporting of the demographic s of the participants in the study? | 7. Was there clear reporting of clinical information of the participants? | 8. Were the outcomes or follow up results of cases clearly reported? | 9. Was there clear reporting of the presenting site(s)/clinic(s) demographic information? | 10. Was statistical analysis appropriate? |
|--------------------|----------------------------------------------------------------|-------------------------------------------------------------------------------------------------------------|------------------------------------------------------------------------------------------------------------------|--------------------------------------------------------------------|-----------------------------------------------------------------|-------------------------------------------------------------------------------------|---------------------------------------------------------------------------|----------------------------------------------------------------------|-------------------------------------------------------------------------------------------|-------------------------------------------|
| Andersson M et al. | Y                                                              | Y                                                                                                           | Y                                                                                                                | N                                                                  | N                                                               | Y                                                                                   | Y                                                                         | Y                                                                    | Y                                                                                         | Y                                         |
| Bullard J et al.   | Y                                                              | Y                                                                                                           | Y                                                                                                                | N                                                                  | U                                                               | Y                                                                                   | N                                                                         | Y                                                                    | N                                                                                         | Y                                         |
| Cai J et al.       | Y                                                              | Y                                                                                                           | Y                                                                                                                | Y                                                                  | Y                                                               | Y                                                                                   | Y                                                                         | Y                                                                    | Y                                                                                         | NA                                        |
| Cai Q et al.       | Y                                                              | Y                                                                                                           | Y                                                                                                                | Y                                                                  | Y                                                               | Y                                                                                   | Y                                                                         | Y                                                                    | Y                                                                                         | Y                                         |
| Chang D et al.     | Y                                                              | U                                                                                                           | U                                                                                                                | Y                                                                  | Y                                                               | Y                                                                                   | Y                                                                         | Y                                                                    | Y                                                                                         | Y                                         |
| Chau N et al.      | Y                                                              | Y                                                                                                           | Y                                                                                                                | Y                                                                  | N                                                               | Y                                                                                   | Y                                                                         | Y                                                                    | Y                                                                                         | Y                                         |
| Chen J et al.      | Y                                                              | Y                                                                                                           | Y                                                                                                                | U                                                                  | U                                                               | Y                                                                                   | Y                                                                         | Y                                                                    | Y                                                                                         | Y                                         |
| Chen X et al.      | Y                                                              | Y                                                                                                           | Y                                                                                                                | N                                                                  | Y                                                               | Y                                                                                   | Y                                                                         | Y                                                                    | Y                                                                                         | Y                                         |
| Chen X et al.      | Y                                                              | Y                                                                                                           | Y                                                                                                                | Y                                                                  | Y                                                               | Y                                                                                   | Y                                                                         | Y                                                                    | Y                                                                                         | Y                                         |
| Chen Y et al.      | Y                                                              | Y                                                                                                           | Y                                                                                                                | U                                                                  | Y                                                               | Y                                                                                   | Y                                                                         | Y                                                                    | Y                                                                                         | Y                                         |
| Corman V et al.    | N                                                              | Y                                                                                                           | Y                                                                                                                | N                                                                  | N                                                               | N                                                                                   | Y                                                                         | Y                                                                    | N                                                                                         | NA                                        |
| Fan L et al.       | Y                                                              | Y                                                                                                           | Y                                                                                                                | Y                                                                  | Y                                                               | Y                                                                                   | Y                                                                         | Y                                                                    | Y                                                                                         | Y                                         |
| Fang Z et al.      | U                                                              | Y                                                                                                           | Y                                                                                                                | N                                                                  | U                                                               | Y                                                                                   | Y                                                                         | Y                                                                    | Y                                                                                         | Y                                         |
| Fu S et al.        | Y                                                              | Y                                                                                                           | Y                                                                                                                | Y                                                                  | Y                                                               | Y                                                                                   | Y                                                                         | Y                                                                    | Y                                                                                         | Y                                         |
| Han M et al.       | Y                                                              | Y                                                                                                           | Y                                                                                                                | Y                                                                  | Y                                                               | Y                                                                                   | Y                                                                         | Y                                                                    | Y                                                                                         | N                                         |
| He X et al.        | Y                                                              | Y                                                                                                           | Y                                                                                                                | Y                                                                  | Y                                                               | Y                                                                                   | Y                                                                         | Y                                                                    | Y                                                                                         | Y                                         |
| Hu X et al.        | Y                                                              | Y                                                                                                           | Y                                                                                                                | N                                                                  | U                                                               | Y                                                                                   | Y                                                                         | Y                                                                    | Y                                                                                         | Y                                         |
| Hu Z et al.        | Y                                                              | Y                                                                                                           | Y                                                                                                                | N                                                                  | Y                                                               | Y                                                                                   | Y                                                                         | Y                                                                    | Y                                                                                         | Y                                         |
| Huang H et al.     | Y                                                              | Y                                                                                                           | Y                                                                                                                | U                                                                  | Y                                                               | Y                                                                                   | Y                                                                         | Y                                                                    | Y                                                                                         | Y                                         |
| Huang J et al.     | Y                                                              | U                                                                                                           | U                                                                                                                | U                                                                  | U                                                               | Y                                                                                   | Y                                                                         | Y                                                                    | Y                                                                                         | Y                                         |
| Kim E et al.       | Y                                                              | Y                                                                                                           | Y                                                                                                                | Y                                                                  | Y                                                               | Y                                                                                   | Y                                                                         | Y                                                                    | Y                                                                                         | Y                                         |
| Kujawski S et al.  | Y                                                              | Y                                                                                                           | Y                                                                                                                | U                                                                  | U                                                               | Y                                                                                   | Y                                                                         | Y                                                                    | N                                                                                         | Y                                         |

|                     |   |   |   |   |   |   |   |   |   |    |
|---------------------|---|---|---|---|---|---|---|---|---|----|
| L'Huillier A et al. | Y | Y | Y | N | Y | Y | N | Y | N | Y  |
| La Scola B et al.   | N | Y | Y | N | U | N | N | Y | N | Y  |
| Le T et al.         | Y | Y | Y | U | Y | Y | N | Y | Y | NA |
| Li N et al.         | Y | Y | Y | N | Y | Y | Y | N | Y | Y  |
| Liang M et al.      | Y | Y | Y | N | U | Y | Y | Y | Y | Y  |
| Ling Y et al.       | Y | Y | Y | N | Y | Y | Y | Y | Y | Y  |
| Liu L et al.        | Y | Y | Y | Y | Y | Y | Y | Y | Y | Y  |
| Liu Y et al.        | Y | Y | Y | U | U | Y | Y | Y | Y | Y  |
| Lo I et al.         | Y | Y | Y | N | N | Y | Y | Y | Y | Y  |
| Lou B et al.        | Y | Y | Y | N | Y | Y | N | Y | Y | Y  |
| Pongpirul W et al.  | Y | Y | Y | N | N | Y | Y | Y | Y | Y  |
| Qian G et al.       | Y | Y | Y | N | N | N | N | Y | N | NA |
| Quan W et al.       | Y | Y | Y | N | N | Y | Y | Y | Y | Y  |
| Sakurai A et al.    | Y | Y | Y | Y | Y | Y | Y | Y | Y | Y  |
| Seah I et al.       | U | Y | Y | N | U | Y | Y | Y | N | NA |
| Shastri A et al.    | Y | Y | Y | N | U | Y | Y | Y | Y | Y  |
| Shi J et al.        | Y | Y | Y | N | U | Y | N | Y | Y | Y  |
| Song C et al.       | N | Y | Y | N | N | Y | Y | Y | N | NA |
| Song R et al.       | Y | Y | Y | N | Y | Y | Y | Y | Y | Y  |
| Talmy T et al.      | Y | Y | Y | N | Y | Y | Y | Y | Y | Y  |
| Tan L et al.        | Y | Y | Y | N | Y | Y | Y | Y | Y | Y  |
| Tan W et al.        | Y | Y | Y | Y | Y | Y | Y | Y | Y | Y  |
| Tan Y et al.        | Y | Y | Y | U | Y | Y | Y | Y | Y | Y  |
| Tian D et al.       | Y | Y | Y | U | U | Y | Y | Y | Y | Y  |
| To K et al.         | Y | Y | Y | N | N | Y | N | Y | N | NA |
| Tu Y et al.         | Y | Y | Y | Y | Y | Y | Y | Y | Y | Y  |
| Wang L et al.       | Y | Y | Y | Y | Y | Y | Y | Y | Y | Y  |
| Wang S et al.       | Y | Y | Y | N | U | Y | Y | Y | Y | Y  |
| Wolfel R et al.     | N | Y | Y | N | N | N | Y | Y | U | Y  |
| Wu B et al.         | Y | Y | Y | Y | Y | Y | Y | Y | Y | Y  |
| Wu Q et al.         | Y | Y | Y | U | U | Y | Y | Y | Y | Y  |

|                   |   |   |   |   |   |   |   |   |   |    |
|-------------------|---|---|---|---|---|---|---|---|---|----|
| Wu Y et al.       | Y | Y | Y | N | N | Y | Y | Y | Y | Y  |
| Wyllie A et al.   | Y | Y | Y | U | N | Y | Y | Y | Y | Y  |
| Xiao A et al.     | Y | Y | Y | U | Y | Y | N | Y | Y | Y  |
| Xiao F et al.     | N | Y | Y | U | U | N | N | Y | Y | NA |
| Xu L et al.       | N | Y | Y | U | U | Y | Y | Y | N | NA |
| Xu Y et al.       | Y | Y | Y | Y | Y | Y | Y | Y | Y | Y  |
| Yan D et al.      | Y | Y | Y | N | Y | Y | Y | Y | Y | Y  |
| Yang R et al.     | Y | Y | Y | Y | Y | Y | Y | Y | Y | Y  |
| Yang Y et al.     | Y | Y | Y | U | U | Y | N | Y | Y | Y  |
| Yongchen Z et al. | U | Y | Y | N | N | Y | N | Y | Y | U  |
| Young B et al.    | Y | Y | Y | Y | Y | Y | Y | Y | Y | Y  |
| Zha L et al.      | Y | Y | Y | N | Y | Y | Y | Y | Y | Y  |
| Zhang N et al.    | Y | U | Y | U | U | Y | Y | Y | N | Y  |
| Zhang Z et al.    | Y | Y | Y | U | Y | Y | Y | Y | Y | Y  |
| Zhou B et al.     | Y | Y | Y | U | U | Y | N | Y | Y | Y  |
| Zhou F et al.     | Y | Y | Y | Y | Y | Y | Y | Y | Y | Y  |
| Zhou R et al.     | Y | Y | Y | U | U | Y | N | Y | Y | Y  |
| Zhu L et al.      | Y | Y | Y | U | U | Y | Y | Y | Y | Y  |
| Zou L et al.      | U | Y | Y | U | U | Y | Y | Y | U | Y  |

**SARS-CoV-1**

|                 |   |   |   |   |   |   |   |   |   |   |
|-----------------|---|---|---|---|---|---|---|---|---|---|
| Chan P et al.   | Y | Y | Y | N | N | Y | N | Y | N | Y |
| Chen W et al.   | Y | Y | Y | N | N | Y | N | Y | N | Y |
| Cheng P et al.  | Y | Y | Y | N | U | N | N | Y | N | Y |
| Kwan B et al.   | Y | Y | Y | U | Y | Y | Y | Y | N | Y |
| Leong H et al.  | Y | Y | Y | N | U | Y | N | Y | N | Y |
| Liu W et al.    | Y | Y | Y | N | N | Y | Y | Y | N | Y |
| Peiris J et al. | Y | Y | Y | U | N | Y | Y | Y | Y | Y |
| Xu D et al.     | Y | Y | Y | U | U | N | N | Y | Y | Y |

**MERS**

|                    |   |   |   |   |   |   |   |   |   |   |
|--------------------|---|---|---|---|---|---|---|---|---|---|
| Al Hosani F et al. | Y | Y | Y | N | Y | Y | Y | Y | N | Y |
| Al-Jasser F et al. | Y | Y | Y | U | Y | Y | Y | Y | Y | Y |

|                  |   |   |   |   |   |   |   |   |   |   |    |
|------------------|---|---|---|---|---|---|---|---|---|---|----|
| Alkendi F et al. | Y | Y | Y | U | Y | Y | Y | Y | Y | Y | NA |
| Corman V et al.  | Y | Y | Y | U | U | Y | N | Y | N | Y | Y  |
| Hong K et al.    | Y | Y | Y | Y | Y | Y | Y | Y | N | Y | Y  |
| Min C-K et al.   | Y | Y | Y | N | U | Y | Y | Y | N | Y | Y  |
| Muth D et al.    | Y | Y | Y | U | U | Y | N | Y | Y | Y | Y  |
| Oh M et al.      | Y | Y | Y | Y | Y | N | N | Y | Y | Y | Y  |
| Park W et al.    | Y | Y | Y | U | U | N | N | Y | Y | Y | Y  |

**COHORT**

| Author | 1. Were the two groups similar and recruited from the same population? | 2. Were the exposures measured similarly to both exposed and unexposed groups? | 3. Was the exposure measured in a valid and reliable way? | 4. Were confounding factors identified? | 5. Were strategies to deal with confounding factors stated? | 6. Were the groups/participants free of the outcome at the start of the study (or at the moment of exposure)? | 7. Were the outcomes measured in a valid and reliable way? | 8. Was the follow up time reported and sufficient to belong enough for outcomes to occur? | 9. Was follow up complete, and if not, were the reasons to loss to follow up described and explored? | 10. Were strategies to address incomplete follow up utilized? | 11. Was appropriate statistical analysis used? |
|--------|------------------------------------------------------------------------|--------------------------------------------------------------------------------|-----------------------------------------------------------|-----------------------------------------|-------------------------------------------------------------|---------------------------------------------------------------------------------------------------------------|------------------------------------------------------------|-------------------------------------------------------------------------------------------|------------------------------------------------------------------------------------------------------|---------------------------------------------------------------|------------------------------------------------|
|--------|------------------------------------------------------------------------|--------------------------------------------------------------------------------|-----------------------------------------------------------|-----------------------------------------|-------------------------------------------------------------|---------------------------------------------------------------------------------------------------------------|------------------------------------------------------------|-------------------------------------------------------------------------------------------|------------------------------------------------------------------------------------------------------|---------------------------------------------------------------|------------------------------------------------|

**SARS-CoV-2**

|                |    |    |   |   |   |    |   |   |    |    |   |
|----------------|----|----|---|---|---|----|---|---|----|----|---|
| Huang L et al. | Y  | Y  | Y | Y | Y | Y  | Y | Y | NA | NA | Y |
| To K et al     | NA | NA | Y | Y | N | NA | Y | Y | Y  | NA | Y |
| Xu K et al     | NA | NA | Y | Y | Y | NA | Y | Y | Y  | NA | Y |
| Zheng S et al  | NA | NA | Y | Y | Y | NA | Y | Y | Y  | NA | Y |

**MERS**

|                   |   |   |   |   |   |   |   |   |   |   |   |
|-------------------|---|---|---|---|---|---|---|---|---|---|---|
| Arabi Y et al.    | N | Y | Y | Y | Y | Y | Y | Y | U | U | Y |
| Shalhoub S et al. | Y | Y | Y | Y | Y | Y | Y | Y | U | U | Y |

**CROSS SECTIONAL STUDIES**

**SARS-CoV-2**

| Author          | 1. Were the criteria for inclusion in the sample clearly defined? | 2. Were the study subjects and the setting described in detail? | 3. Was the exposure measured in a valid and reliable way? | 4. Were objective, standard criteria used for measurement of the condition? | 5. Were confounding factors identified? | 6. Were strategies to deal with confounding factors stated? | 7. Were the outcomes measured in a valid and reliable way? |
|-----------------|-------------------------------------------------------------------|-----------------------------------------------------------------|-----------------------------------------------------------|-----------------------------------------------------------------------------|-----------------------------------------|-------------------------------------------------------------|------------------------------------------------------------|
| Arons M et al   | Y                                                                 | Y                                                               | Y                                                         | Y                                                                           | N                                       | Y                                                           | Y                                                          |
| Lavezzo E et al | Y                                                                 | Y                                                               | Y                                                         | Y                                                                           | Y                                       | Y                                                           | Y                                                          |

**RANDOMISED CONTROLLED TRIALS**

**SARS-CoV-2**

|  | 1. Was true randomization used for assignment of participants to treatment groups? | 2. Was allocation to treatment groups concealed? | 3. Were treatment groups similar at baseline? | 4. Were participants blind to treatment assignment? | 5. Were those delivering treatment blind to treatment assignment? | 6. Were outcomes assessed blind to treatment assignment? | 7. Were treatment groups treated identically other than the intervention of interest? | 8. Was follow up complete if not, were differences between groups in terms of their follow up adequately described and analyzed? | 9. Were participants analyzed in the groups to which they were randomized? | 10. Were outcomes measured in the same way for treatment groups? | 11. Were outcomes measured in a reliable way? | 12. Was appropriate statistical analysis used? | 13. Was the trial design appropriate, and any deviations from the standard RCT design (individual randomization, parallel groups) accounted for in the conduct and analysis of the trial? |
|--|------------------------------------------------------------------------------------|--------------------------------------------------|-----------------------------------------------|-----------------------------------------------------|-------------------------------------------------------------------|----------------------------------------------------------|---------------------------------------------------------------------------------------|----------------------------------------------------------------------------------------------------------------------------------|----------------------------------------------------------------------------|------------------------------------------------------------------|-----------------------------------------------|------------------------------------------------|-------------------------------------------------------------------------------------------------------------------------------------------------------------------------------------------|
|--|------------------------------------------------------------------------------------|--------------------------------------------------|-----------------------------------------------|-----------------------------------------------------|-------------------------------------------------------------------|----------------------------------------------------------|---------------------------------------------------------------------------------------|----------------------------------------------------------------------------------------------------------------------------------|----------------------------------------------------------------------------|------------------------------------------------------------------|-----------------------------------------------|------------------------------------------------|-------------------------------------------------------------------------------------------------------------------------------------------------------------------------------------------|

|               |   |   |   |   |   |   |   |   |   |   |   |   |   |
|---------------|---|---|---|---|---|---|---|---|---|---|---|---|---|
| Hung I et al. | Y | N | Y | N | N | N | Y | Y | Y | Y | Y | Y | Y |
|---------------|---|---|---|---|---|---|---|---|---|---|---|---|---|

## Search strategy

**Research question:** What is the duration and dynamics of viral shedding in various body fluids in coronaviruses?

### Search methods:

The following databases will be searched: MEDLINE and EMBASE. For the following conferences we will hand search abstracts: European Congress of Clinical Microbiology and Infectious Diseases (ECCMID). Additionally, if any literature reviews are identified, reference lists of those review articles will be searched.

**Time:** the search will be limited to literature published after 2003, since the first recognised case of SARS was identified in March 2003.

**Language:** only English language articles will be reviewed.

### Search terms:

1. nCoV or n-Cov
2. 2019-nCoV
3. coronavirus disease 2019
4. coronavirus disease-19
5. novel coronavirus
6. COVID
7. COVID-19
8. Middle East Respiratory Syndrome Coronavirus/
9. Middle East respiratory syndrome
10. MERS
11. SARS Virus/
12. SARS
13. severe acute respiratory syndrome
14. 1 or 2 or 3 or 4 or 5 or 6 or 7 or 8 or 9 or 10 or 11 or 12 or 13
15. shed\* OR viabl\*
16. viral OR virus OR rna OR ribonucleic
17. viral shedding
18. 15 or 16 or 17
19. 14 AND 18

## References:

1. Andersson M, Arancibia - Carcamo CV, Auckland K, et al. SARS-CoV-2 RNA detected in blood samples from patients with COVID-19 is not associated with infectious virus. *medRxiv* 2020: 2020.05.21.20105486.
2. Arons MM, Hatfield KM, Reddy SC, et al. Presymptomatic SARS-CoV-2 Infections and Transmission in a Skilled Nursing Facility. *New England Journal of Medicine* 2020; **382**(22): 2081-90.
3. Bullard J, Dust K, Funk D, et al. Predicting Infectious Severe Acute Respiratory Syndrome Coronavirus 2 From Diagnostic Samples. *Clinical Infectious Diseases* 2020.
4. Cai J, Xu J, Lin D, et al. A Case Series of children with 2019 novel coronavirus infection: clinical and epidemiological features. *Clinical Infectious Diseases* 2020; **28**: 28.
5. Cai Q, Huang D, Ou P, et al. COVID-19 in a designated infectious diseases hospital outside Hubei Province, China. *Allergy* 2020; **75**(7): 1742-52.
6. Chang D, Mo G, Yuan X, et al. Time Kinetics of Viral Clearance and Resolution of Symptoms in Novel Coronavirus Infection. *Am J Respir Crit Care Med* 2020; **201**(9): 1150-2.
7. Chau NVV, Thanh Lam V, Thanh Dung N, et al. The natural history and transmission potential of asymptomatic SARS-CoV-2 infection. *Clinical Infectious Diseases* 2020.
8. Chen J, Qi T, Liu L, et al. Clinical progression of patients with COVID-19 in Shanghai, China. *Journal of Infection* 2020; **80**(5): e1-e6.
9. Chen X, Ling J, Mo P, et al. Restoration of leukomonocyte counts is associated with viral clearance in COVID-19 hospitalized patients. *medRxiv* 2020: 2020.03.03.20030437.
10. Chen X, Zhu B, Hong W, et al. Associations of clinical characteristics and treatment regimens with the duration of viral RNA shedding in patients with COVID-19. *International Journal of Infectious Diseases* 2020; **98**: 252-60.
11. Chen Y, Chen L, Deng Q, et al. The presence of SARS-CoV-2 RNA in the feces of COVID-19 patients. *Journal of Medical Virology* 2020; **03**: 03.
12. Corman VM, Rabenau HF, Adams O, et al. SARS-CoV-2 asymptomatic and symptomatic patients and risk for transfusion transmission. *Transfusion* 2020; **60**(6): 1119-22.
13. Fan L, Liu C, Li N, et al. Medical treatment of 55 patients with COVID-19 from seven cities in northeast China who fully recovered: a single-center, retrospective, observational study. *medRxiv* 2020: 2020.03.28.20045955.
14. Fang Z, Zhang Y, Hang C, Ai J, Li S, Zhang W. Comparisons of viral shedding time of SARS-CoV-2 of different samples in ICU and non-ICU patients. *Journal of Infection* 2020; **21**: 21.
15. Fu S, Fu X, Song Y, et al. Virologic and clinical characteristics for prognosis of severe COVID-19: a retrospective observational study in Wuhan, China. *medRxiv* 2020: 2020.04.03.20051763.
16. Han MS, Seong M-W, Kim N, et al. Early Release - Viral RNA Load in Mildly Symptomatic and Asymptomatic Children with COVID-19, Seoul - Volume 26, Number 10—October 2020 - Emerging Infectious Diseases journal - CDC.
17. He X, Lau EHY, Wu P, et al. Temporal dynamics in viral shedding and transmissibility of COVID-19. *Nature Medicine*; **26**(5): 672-5.
18. Hu X, Xing Y, Jia J, et al. Factors associated with negative conversion of viral RNA in patients hospitalized with COVID-19. *Science of the Total Environment* 2020; **728** (no pagination).
19. Hu Z, Song C, Xu C, et al. Clinical characteristics of 24 asymptomatic infections with COVID-19 screened among close contacts in Nanjing, China. *Science China Life Sciences* 2020; **63**(5): 706-11.
20. Huang H, Guan L, Yang Y, et al. Chloroquine, arbidol (umifenovir) or lopinavir/ritonavir as the antiviral monotherapy for COVID-19 patients: a retrospective cohort study. 2020.
21. Huang J, Mao T, Li S, et al. Long period dynamics of viral load and antibodies for SARS-CoV-2 infection: an observational cohort study. *medRxiv* 2020: 2020.04.22.20071258.
22. Huang L, Chen Z, Ni L, et al. Impact of Angiotensin-converting Enzyme Inhibitors and Angiotensin Receptor Blockers on Inflammatory Responses and Viral Clearance in COVID-19 Patients: A Multicenter Retrospective Cohort Study. *ResearchSquare* 2020.
23. Hung IFN, Lung KC, Tso EYK, et al. Triple combination of interferon beta-1b, lopinavir-ritonavir, and ribavirin in the treatment of patients admitted to hospital with COVID-19: an open-label, randomised, phase 2 trial. *The Lancet* 2020; **395**(10238): 1695-704.
24. Kim ES, Chin BS, Kang CK, et al. Clinical Course and Outcomes of Patients with Severe Acute Respiratory Syndrome Coronavirus 2 Infection: a Preliminary Report of the First 28 Patients from the Korean Cohort Study on COVID-19. *J Korean Med Sci* 2020; **35**(13): e142.
25. Kujawski SA, Wong KK, Collins JP, et al. Clinical and virologic characteristics of the first 12 patients with coronavirus disease 2019 (COVID-19) in the United States. *Nature Medicine* 2020; **26**(6): 861-8.



26. L'Huillier AG, Torriani G, Pigny F, Kaiser L, Eckerle I. Culture-Competent SARS-CoV-2 in Nasopharynx of Symptomatic Neonates, Children, and Adolescents. *Emerg Infect Dis* 2020; **26**(10): 2494-7.
27. La Scola B, Le Bideau M, Andreani J, et al. Viral RNA load as determined by cell culture as a management tool for discharge of SARS-CoV-2 patients from infectious disease wards. *Eur J Clin Microbiol Infect Dis* 2020: 1-3.
28. Lavezzo E, Franchin E, Ciavarella C, et al. Suppression of a SARS-CoV-2 outbreak in the Italian municipality of Vo'. *Nature* 2020; **584**(7821): 425-9.
29. Le TQM, Takemura T, Moi ML, et al. Severe Acute Respiratory Syndrome Coronavirus 2 Shedding by Travelers, Vietnam, 2020. *Emerg Infect Dis* 2020; **26**(7): 02.
30. Li N, Wang X, Lv T. Prolonged SARS-CoV-2 RNA shedding: Not a rare phenomenon. *Journal of Medical Virology* 2020; **92**(11): 2286-7.
31. Liang M, Chen P, He M, et al. Corticosteroid Treatment in Critically Ill Patients with COVID-19: A Retrospective Cohort Study. *ResearchSquare* 2020.
32. Ling Y, Xu S-B, Lin Y-X, et al. Persistence and clearance of viral RNA in 2019 novel coronavirus disease rehabilitation patients. *Chinese Medical Journal* 2020; **133**(9).
33. Liu L, Liu W, Zheng Y, et al. A preliminary study on serological assay for severe acute respiratory syndrome coronavirus 2 (SARS-CoV-2) in 238 admitted hospital patients. *Microbes and Infection* 2020; **22**(4): 206-11.
34. Liu Y, Yan L-M, Wan L, et al. Viral dynamics in mild and severe cases of COVID-19. *Lancet Infect Dis* 2020; **20**(6): 656-7.
35. Lo IL, Lio CF, Cheong HH, et al. Evaluation of SARS-CoV-2 RNA shedding in clinical specimens and clinical characteristics of 10 patients with COVID-19 in Macau. *Int J Biol Sci* 2020; **16**(10): 1698-707.
36. Lou B, Li T-D, Zheng S-F, et al. Serology characteristics of SARS-CoV-2 infection after exposure and post-symptom onset. *European Respiratory Journal* 2020; **56**(2): 2000763.
37. Pongpirul WA, Mott JA, Woodring JV, et al. Clinical Characteristics of Patients Hospitalized with Coronavirus Disease, Thailand - Volume 26, Number 7—July 2020 - Emerging Infectious Diseases journal - CDC.
38. Qian GQ, Chen XQ, Lv DF, et al. Duration of SARS-CoV-2 viral shedding during COVID-19 infection. *Infect Dis (Lond)* 2020: 1-2.
39. quan w, zheng q, tian j, et al. No SARS-CoV-2 in expressed prostatic secretion of patients with coronavirus disease 2019: a descriptive multicentre study in China. *medRxiv* 2020: 2020.03.26.20044198.
40. Sakurai A, Sasaki T, Kato S, et al. Natural History of Asymptomatic SARS-CoV-2 Infection. *New England Journal of Medicine* 2020; **383**(9): 885-6.
41. Seah IYJ, Anderson DE, Kang AEZ, et al. Assessing Viral Shedding and Infectivity of Tears in Coronavirus Disease 2019 (COVID-19) Patients. *Ophthalmology* 2020; **24**: 24.
42. Shastri A, Wheat J, Agrawal S, et al. Delayed clearance of SARS-CoV2 in male compared to female patients: High ACE2 expression in testes suggests possible existence of gender-specific viral reservoirs. *medRxiv* 2020: 2020.04.16.20060566.
43. Shi J, Cheng C, Yu M, et al. Systemic Inflammatory Cytokines Associate With SARS-COV-2 Viral Shedding Time in Covid-19 Inpatients. *ResearchSquare* 2020.
44. Song C, Wang Y, Li W, et al. Detection of 2019 novel coronavirus in semen and testicular biopsy specimen of COVID-19 patients. *medRxiv* 2020: 2020.03.31.20042333.
45. Song R, Han B, Song M, et al. Clinical and epidemiological features of COVID-19 family clusters in Beijing, China. *Journal of Infection* 2020; **81**(2): e26-e30.
46. Talmy T, Tsur A, Shabtay O. Duration of SARS-CoV-2 detection in Israel Defense Forces soldiers with mild COVID-19. *Journal of Medical Virology* 2020; **n/a**(n/a).
47. Tan L, Kang X, Ji X, et al. Validation of Predictors of Disease Severity and Outcomes in COVID-19 Patients: A Descriptive and Retrospective Study. *Med* 2020.
48. Tan W, Lu Y, Zhang J, et al. Viral Kinetics and Antibody Responses in Patients with COVID-19. *medRxiv* 2020: 2020.03.24.20042382.
49. Tan Y-p, Tan B-y, Pan J, Wu J, Zeng S-z, Wei H-y. Epidemiologic and clinical characteristics of 10 children with coronavirus disease 2019 in Changsha, China. *Journal of Clinical Virology* 2020; **127**: 104353.
50. Tian D, Wang L, Wang X, et al. Clinical research and factors associated with prolonged duration of viral shedding in patients with COVID-19. *ResearchSquare* 2020.
51. To KK-W, Tsang OT-Y, Leung W-S, et al. Temporal profiles of viral load in posterior oropharyngeal saliva samples and serum antibody responses during infection by SARS-CoV-2: an observational cohort study. *The Lancet Infectious Diseases* 2020; **20**(5): 565-74.
52. To KK-W, Tsang OT-Y, Yip CC-Y, et al. Consistent Detection of 2019 Novel Coronavirus in Saliva. *Clinical Infectious Diseases* 2020; **71**(15): 841-3.

53. Tu Y-H, Wei Y-Y, Zhang D-W, Chen C-S, Hu X-W, Fei G. Analysis of factors affected the SARS-CoV-2 viral shedding time of COVID-19 patients in Anhui, China: a retrospective study. 2020.
54. Wang L, Gao Y-h, Lou L-L, Zhang G-J. The clinical dynamics of 18 cases of COVID-19 outside of Wuhan, China. *European Respiratory Journal* 2020.
55. Wang S, Tu J, Sheng Y. Clinical characteristics and fecal-oral transmission potential of patients with COVID-19. *medRxiv*.
56. Wolfel R, Corman VM, Guggemos W, et al. Virological assessment of hospitalized patients with COVID-2019. *Nature* 2020; **581**(7809): 465-9.
57. Wu B, Lei Z-Y, Wu K-L, et al. Epidemiological and clinical features of imported and local patients with coronavirus disease 2019 (COVID-19) in Hainan, China. *ResearchSquare* 2020.
58. Wu Q, Xing Y, Shi L, et al. Epidemiological and Clinical Characteristics of Children with Coronavirus Disease 2019. *medRxiv* 2020: 2020.03.19.20027078.
59. Wu Y, Guo C, Tang L, et al. Prolonged presence of SARS-CoV-2 viral RNA in faecal samples. *Lancet Gastroenterol Hepatol* 2020; **5**(5): 434-5.
60. Wylie AL, Fournier J, Casanovas-Massana A, et al. Saliva or Nasopharyngeal Swab Specimens for Detection of SARS-CoV-2. *New England Journal of Medicine* 2020; **383**(13): 1283-6.
61. Xiao AT, Tong YX, Zhang S. Profile of RT-PCR for SARS-CoV-2: a preliminary study from 56 COVID-19 patients. *Clinical Infectious Diseases* 2020; **19**: 19.
62. Xiao F, Sun J, Xu Y, et al. Infectious SARS-CoV-2 in Feces of Patient with Severe COVID-19. *Emerging Infectious Disease journal* 2020; **26**(8).
63. Xu K, Chen Y, Yuan J, et al. Factors associated with prolonged viral RNA shedding in patients with COVID-19. *Clinical Infectious Diseases* 2020; **09**: 09.
64. Xu I, Zhang X, Song W, et al. Conjunctival polymerase chain reaction-tests of 2019 novel coronavirus in patients in Shenyang,China. *medRxiv* 2020: 2020.02.23.20024935.
65. Xu Y, Li X, Zhu B, et al. Characteristics of pediatric SARS-CoV-2 infection and potential evidence for persistent fecal viral shedding. *Nature Medicine* 2020; **26**(4): 502-5.
66. Yan D, Liu X-Y, Zhu Y-n, et al. Factors associated with prolonged viral shedding and impact of lopinavir/ritonavir treatment in hospitalised non-critically ill patients with SARS-CoV-2 infection. *European Respiratory Journal* 2020; **56**(1): 2000799.
67. Yang R, Gui X, Xiong Y. Comparison of Clinical Characteristics of Patients with Asymptomatic vs Symptomatic Coronavirus Disease 2019 in Wuhan, China. *JAMA Netw Open* 2020; **3**(5).
68. Yang Y, Yang M, Shen C, et al. Evaluating the accuracy of different respiratory specimens in the laboratory diagnosis and monitoring the viral shedding of 2019-nCoV infections. *medRxiv* 2020: 2020.02.11.20021493.
69. Yongchen Z, Shen H, Wang X, et al. Different longitudinal patterns of nucleic acid and serology testing results based on disease severity of COVID-19 patients. *Emerg* 2020; **9**(1): 833-6.
70. Young BE, Ong SWX, Kalimuddin S, et al. Epidemiologic Features and Clinical Course of Patients Infected With SARS-CoV-2 in Singapore. *JAMA* 2020; **03**: 03.
71. Zha L, Li S, Pan L, et al. Corticosteroid treatment of patients with coronavirus disease 2019 (COVID-19). *Medical Journal of Australia* 2020; **212**(9): 416-20.
72. Zhang N, Gong Y, Meng F, Bi Y, Yang P, Wang F. Virus shedding patterns in nasopharyngeal and fecal specimens of COVID-19 patients. *medRxiv* 2020: 2020.03.28.20043059.
73. Zhang Z, Xiao T, Wang Y, et al. Early viral clearance and antibody kinetics of COVID-19 among asymptomatic carriers. *medRxiv* 2020: 2020.04.28.20083139.
74. Zheng S, Fan J, Yu F, et al. Viral load dynamics and disease severity in patients infected with SARS-CoV-2 in Zhejiang province, China, January-March 2020: retrospective cohort study. *BMJ* 2020; **369**.
75. Zhou B, She J, Wang Y, Ma X. The duration of viral shedding of discharged patients with severe COVID-19. *Clinical Infectious Diseases* 2020; **17**: 17.
76. Zhou F, Yu T, Du R, et al. Clinical course and risk factors for mortality of adult inpatients with COVID-19 in Wuhan, China: a retrospective cohort study. *Lancet* 2020; **395**(10229): 1054-62.
77. Zhou R, Li F, Chen F, et al. Viral dynamics in asymptomatic patients with COVID-19. *International Journal of Infectious Diseases* 2020; **96**: 288-90.
78. Zhu L, Gong N, Liu B, et al. Coronavirus Disease 2019 Pneumonia in Immunosuppressed Renal Transplant Recipients: A Summary of 10 Confirmed Cases in Wuhan, China. *Eur Urol* 2020; **18**: 18.
79. Zou L, Ruan F, Huang M, et al. SARS-CoV-2 Viral Load in Upper Respiratory Specimens of Infected Patients. *New England Journal of Medicine* 2020; **382**(12): 1177-9.
80. Chan PK, To WK, Ng KC, et al. Laboratory diagnosis of SARS. *Emerg Infect Dis* 2004; **10**(5): 825-31.

81. Chen WJ, Yang JY, Lin JH, et al. Nasopharyngeal shedding of severe acute respiratory syndrome-associated coronavirus is associated with genetic polymorphisms. *Clinical Infectious Diseases* 2006; **42**(11): 1561-9.
82. Cheng PK, Wong DA, Tong LK, et al. Viral shedding patterns of coronavirus in patients with probable severe acute respiratory syndrome. *Lancet* 2004; **363**(9422): 1699-700.
83. Kwan BC, Leung CB, Szeto CC, et al. Severe acute respiratory syndrome in dialysis patients. *J Am Soc Nephrol* 2004; **15**(7): 1883-8.
84. Liu W, Tang F, Fontanet A, et al. Long-term SARS coronavirus excretion from patient cohort, China. *Emerg Infect Dis* 2004; **10**(10): 1841-3.
85. Leong HN, Chan KP, Khan AS, et al. Virus-specific RNA and antibody from convalescent-phase SARS patients discharged from hospital. *Emerg Infect Dis* 2004; **10**(10): 1745-50.
86. Peiris JSM, Chu CM, Cheng VCC, et al. Clinical progression and viral load in a community outbreak of coronavirus-associated SARS pneumonia: a prospective study. *The Lancet* 2003; **361**(9371): 1767-72.
87. Xu D, Zhang Z, Jin L, et al. Persistent shedding of viable SARS-CoV in urine and stool of SARS patients during the convalescent phase. *Eur J Clin Microbiol Infect Dis* 2005; **24**(3): 165-71.
88. Al Hosani FI, Pringle K, Al Mulla M, et al. Response to Emergence of Middle East Respiratory Syndrome Coronavirus, Abu Dhabi, United Arab Emirates, 2013-2014. *Emerg Infect Dis* 2016; **22**(7): 1162-8.
89. Al-Jasser FS, Nouh RM, Youssef RM. Epidemiology and predictors of survival of MERS-CoV infections in Riyadh region, 2014-2015. *J Infect Public Health* 2019; **12**(2): 171-7.
90. Alkendi F, Nair SC, Hashmey R. Descriptive Epidemiology, Clinical Characteristics and Outcomes for Middle East Respiratory Syndrome Coronavirus (MERS-CoV) Infected Patients in AlAin - Abu Dhabi Emirate. *J Infect Public Health* 2019; **12** (1): 137.
91. Arabi YM, Al-Omari A, Mandourah Y, et al. Critically Ill Patients With the Middle East Respiratory Syndrome: A Multicenter Retrospective Cohort Study. *Crit Care Med* 2017; **45**(10): 1683-95.
92. Corman VM, Albarak AM, Omrani AS, et al. Viral Shedding and Antibody Response in 37 Patients With Middle East Respiratory Syndrome Coronavirus Infection. *Clinical Infectious Diseases* 2016; **62**(4): 477-83.
93. Hong KH, Choi JP, Hong SH, et al. Predictors of mortality in Middle East respiratory syndrome (MERS). *Thorax* 2018; **73**(3): 286-9.
94. Min CK, Cheon S, Ha NY, et al. Comparative and kinetic analysis of viral shedding and immunological responses in MERS patients representing a broad spectrum of disease severity. *Sci* 2016; **6**: 25359.
95. Muth D, Corman VM, Meyer B, et al. Infectious middle east respiratory syndrome coronavirus excretion and serotype variability based on live virus isolates from patients in Saudi Arabia. *Journal of Clinical Microbiology* 2015; **53**(9): 2951-5.
96. Oh MD, Park WB, Choe PG, et al. Viral load kinetics of MERS coronavirus infection. *New England Journal of Medicine* 2016; **375**(13): 1303-5.
97. Park WB, Poon LLM, Choi SJ, et al. Replicative virus shedding in the respiratory tract of patients with Middle East respiratory syndrome coronavirus infection. *International Journal of Infectious Diseases* 2018; **72**: 8-10.
98. Shalhoub S, Farahat F, Al-Jiffri A, et al. IFN-alpha2a or IFN-beta1a in combination with ribavirin to treat Middle East respiratory syndrome coronavirus pneumonia: a retrospective study. *J Antimicrob Chemother* 2015; **70**(7): 2129-32.
